# Supplementary material for: A dual-emission fluorescence-enhanced probe for hydrogen sulfide and its application in biological imaging
Source: Royal Society of Chemistry journal article supplement (doi:10.1039/d2nj01195f), 2022-01-01
Supplement: d2nj01195f1.pdf [file d2nj01195f1.pdf]

## **Electronic Supplementary Information (ESI)**

**for**

*New Journal of Chemistry*

### **A Dual-Emission Fluorescence-Enhanced Probe for Hydrogen Sulfide and Its Application in Biological Imaging**

Minghao Li, Yang Jiao\* and Chunying Duan

*State Key Laboratory of Fine Chemicals, Dalian University of Technology, Dalian  
116024, China*

---

\* To whom correspondence should be addressed.

E-mail: jiaoyang@dlut.edu.cn

## Contents

1. Synthesis and characterization of compounds
2. Selectivity and anti-interference ability of **DCH-S** for NaHS
3. The capability of **DCH-S** for detecting NaHS at different pH
4. Kinetic studies
5. LC-MS analysis of the reaction system
6. Cytotoxicity assay
7. Determination of the detection limit
8. Theoretical calculations
9. Mean fluorescence intensities of confocal imaging in MCF-7 cells

## 1. Synthesis and characterization of compounds

### *Synthesis of Compound 1<sup>1</sup>*

A mixture of 7-Hydroxycoumarin-3-carboxylic acid (1.03 g, 5.0 mmol), *N*-Boc-piperazine (0.931 g, 5.0 mmol), EDC·HCl (1.44 g, 7.5 mmol), HOBT (1.01 g, 7.5 mmol) in THF (20 mL) was stirred for 12 h at room temperature. The solvent was removed by evaporation, and the residue was washed with water. The obtained solid was redissolved in CH<sub>2</sub>Cl<sub>2</sub> (2 mL) and TFA (2 mL), and the mixture was stirred for 30 min at room temperature. The solvent was evaporated and dried in vacuo to give compound **1** as a colorless powder (0.623g, 45.4%). <sup>1</sup>H NMR (400 MHz, DMSO-*d*<sub>6</sub>) δ 10.99 (s, 1H), 9.07 (s, 1H), 8.14 (s, 1H), 7.62 (d, *J* = 8.5 Hz, 1H), 6.86 (d, *J* = 8.6 Hz, 1H), 6.78 (s, 1H), 3.86 – 2.98 (m, 8H).

### *Synthesis of Compound 2<sup>2</sup>*

To a solution of 4-Chloro-7-chlorosulfonyl-2,1,3-benzoxadiazole (0.506 g, 2.0 mmol) in CH<sub>2</sub>Cl<sub>2</sub> (20 mL) was added dropwise a solution of dimethylamine hydrochloride (0.204 g, 2.5 mmol) dissolved in CH<sub>2</sub>Cl<sub>2</sub> (20 mL) with triethylamine (700 μL, 5.0 mmol). The mixture was stirred at room temperature for 30 min before the solvent was removed under reduced pressure. The residue was purified through column chromatography (PE: EA = 5: 1) to give compound **2** as a colorless powder (0.302 g, 57.7%). <sup>1</sup>H NMR (400 MHz, CDCl<sub>3</sub>) δ 7.97 (d, *J* = 7.3 Hz, 1H), 7.56 (d, *J* = 7.3 Hz, 1H), 2.96 (s, 6H).

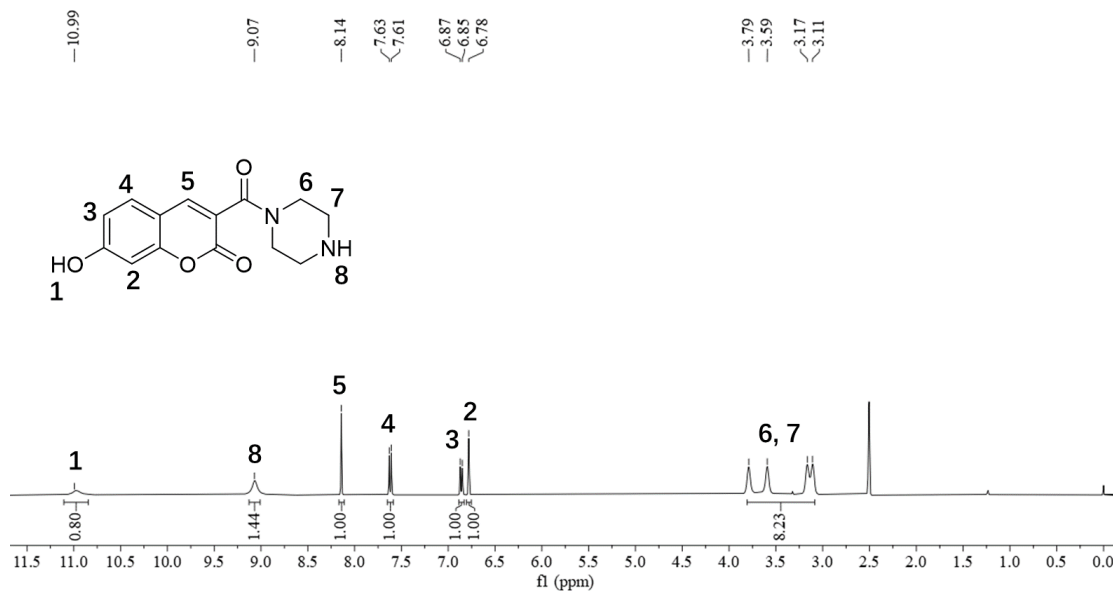

**Fig. S1.**  $^1\text{H}$  NMR spectrum of compound **1** in DMSO- $d_6$

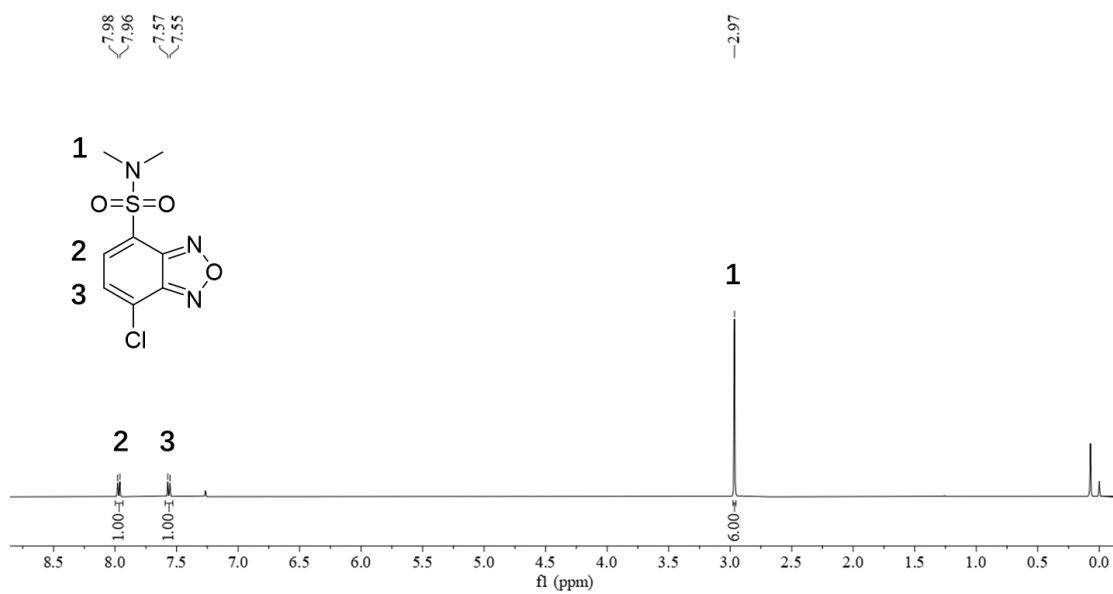

**Fig. S2.**  $^1\text{H}$  NMR spectrum of compound **2** in CDCl $_3$

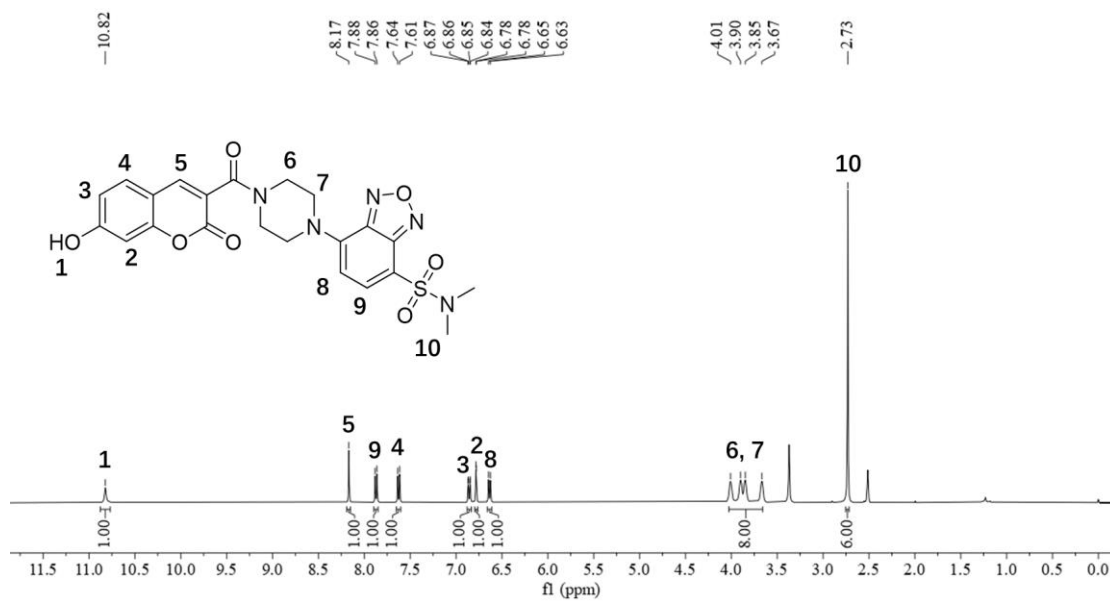

**Fig. S3.** <sup>1</sup>H NMR spectrum of compound **DCH** in DMSO-*d*<sub>6</sub>

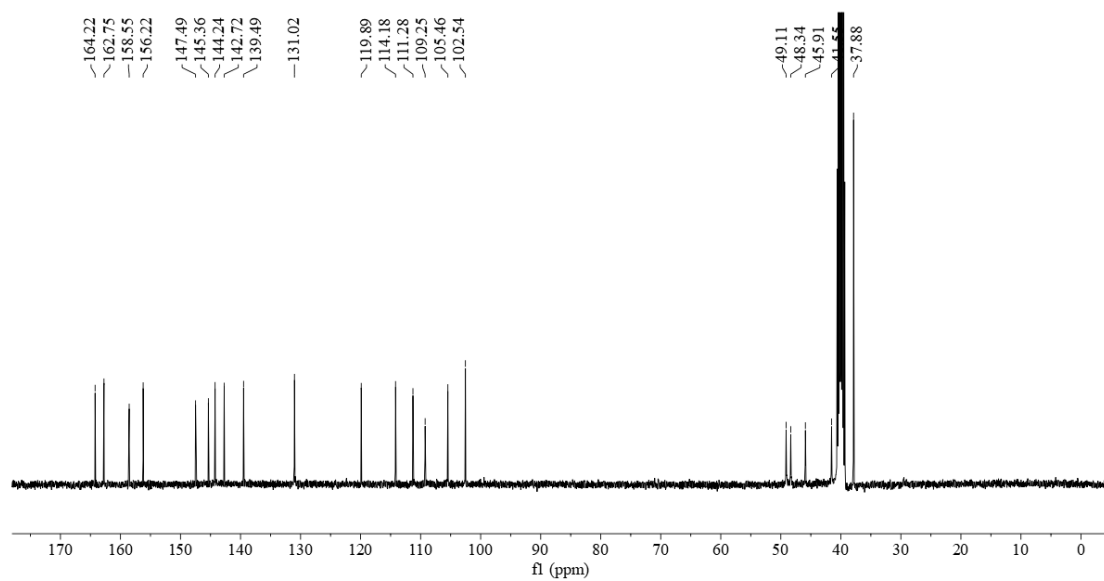

**Fig. S4.** <sup>13</sup>C NMR spectrum of compound **DCH** in DMSO-*d*<sub>6</sub>

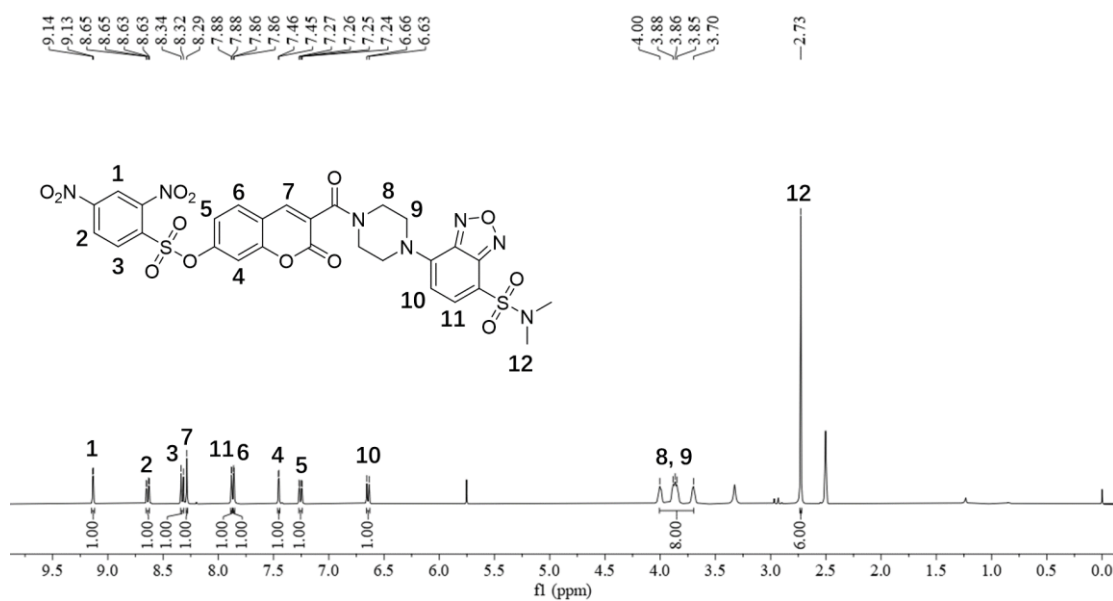

**Fig. S5.** <sup>1</sup>H NMR spectrum of compound **DCH-S** in DMSO-*d*<sub>6</sub>

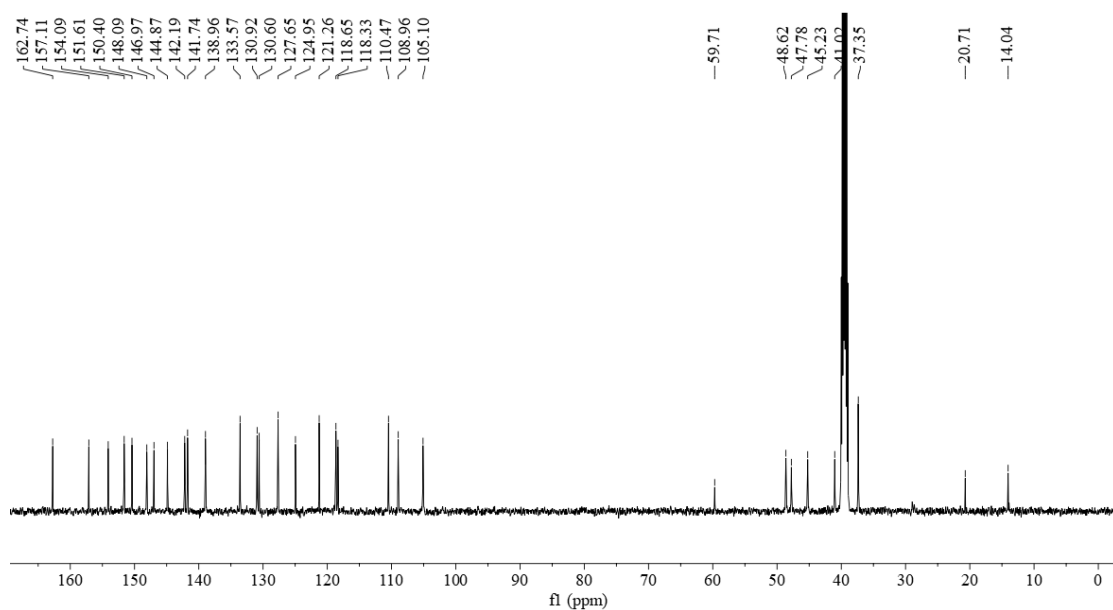

**Fig. S6.** <sup>13</sup>C NMR spectrum of compound **DCH-S** in DMSO-*d*<sub>6</sub>

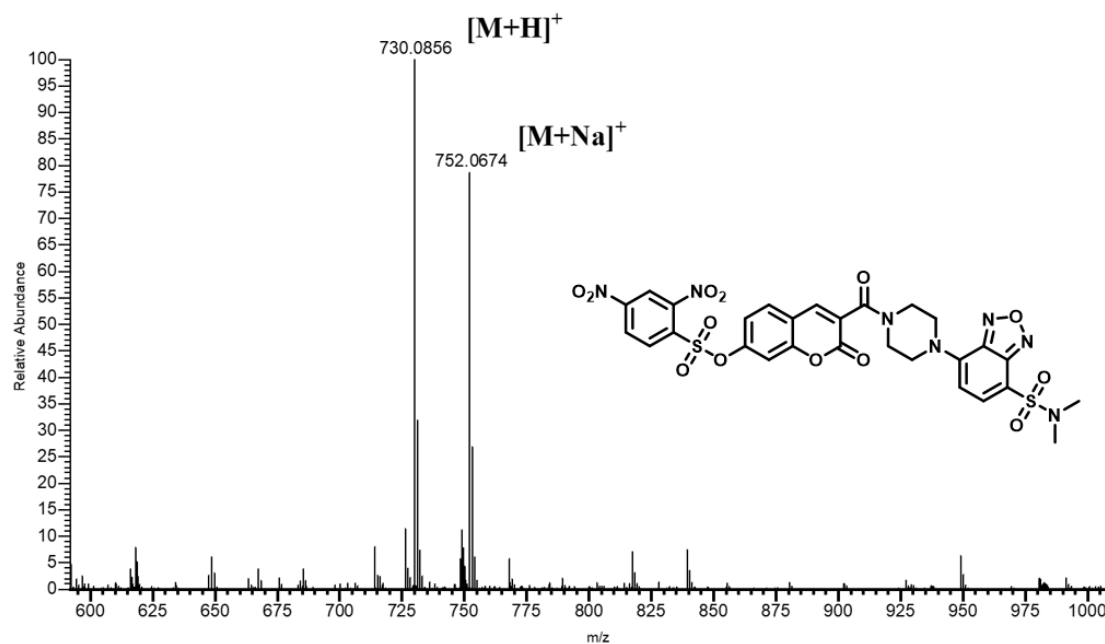

**Fig. S7.** ESI-MS spectrum of compound **DCH-S**

## 2. Selectivity and anti-interference ability of **DCH-S** for NaHS

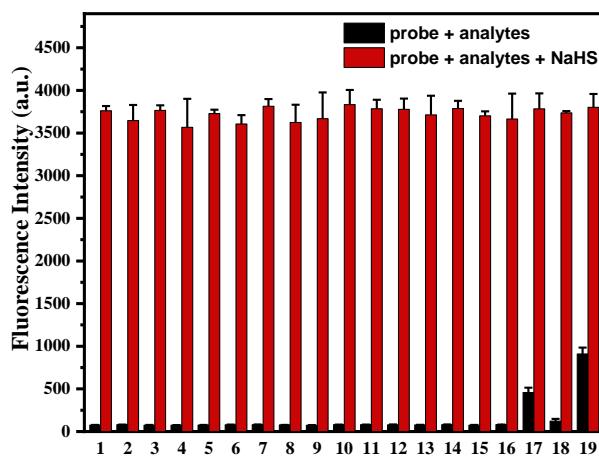

**Fig. S8.** Fluorescence responses of **DCH-S** (5  $\mu\text{M}$ ) at 600 nm towards NaHS (50  $\mu\text{M}$ ) and various analytes. Black bars represent the solution of **DCH-S** in the presence of various analytes. Red bars represent the addition of NaHS to the above solution, respectively. Analytes 1-19: None,  $\text{NaNO}_3$ ,  $\text{NaNO}_2$ ,  $\text{Na}_2\text{SO}_4$ ,  $\text{Na}_2\text{SO}_3$ ,  $\text{Na}_2\text{S}_2\text{O}_3$ ,  $\text{NaCl}$ ,  $\text{KCl}$ ,  $\text{CaCl}_2$ ,  $\text{H}_2\text{O}_2$ , L-ascorbic acid, Glucose, Phe, Pro, Ala, His, Cys, Hcy, GSH.

### 3. The capability of **DCH-S** for detecting NaHS at different pH

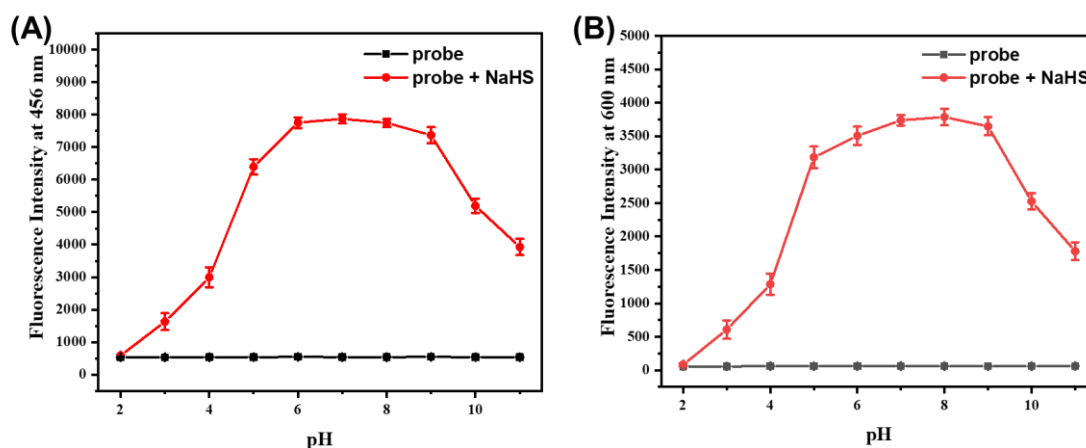

**Fig. S9.** Fluorescence responses of **DCH-S** (5 μM) at (A) 456 nm and (B) 600 nm in the presence and absence of NaHS (50 μM) under different pH values.

### 4. Kinetic studies

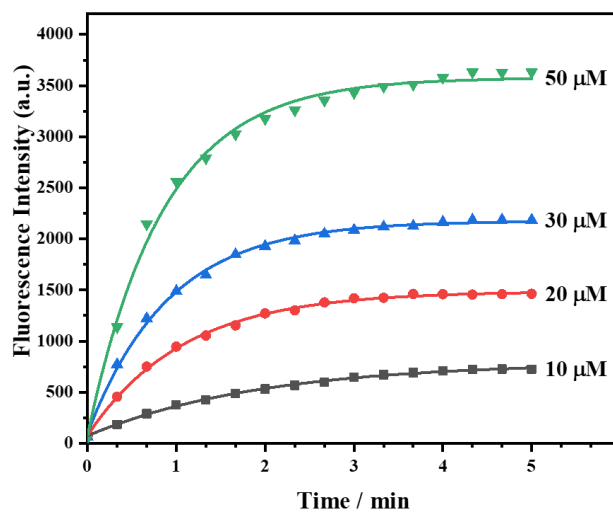

**Fig. S10** Time-dependent fluorescence intensities of **DCH-S** (5 μM) at 600 nm in the presence of different concentration of NaHS (10, 20, 30, 50 μM).



## 5. LC-MS analysis of the reaction system

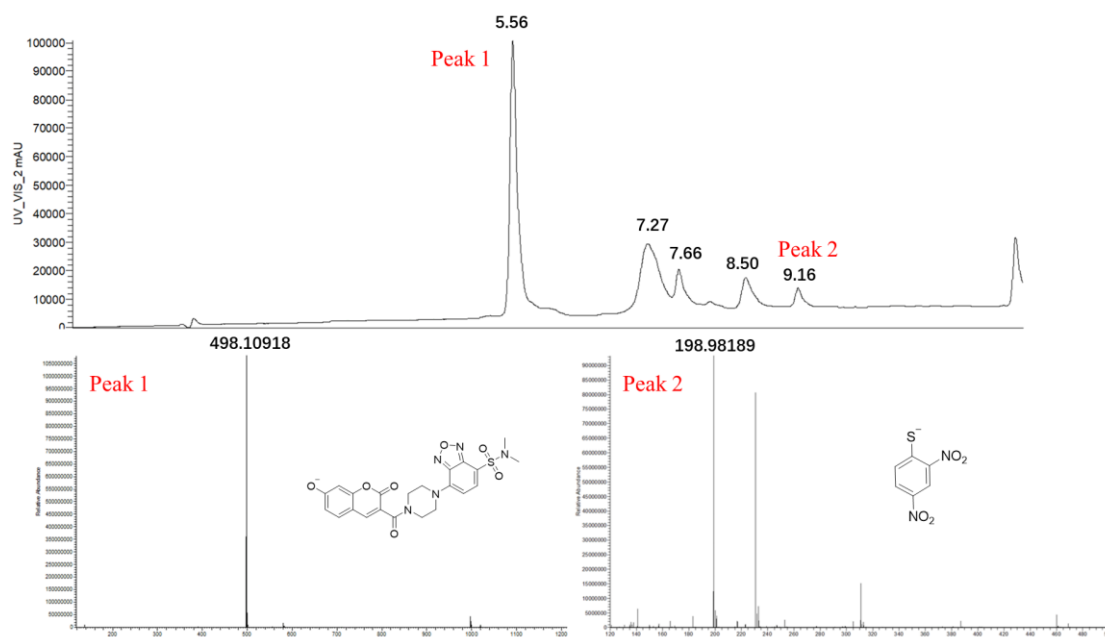

**Fig. S11.** LC-MS analysis of the mixture of **DCH-S** and NaHS (10 equiv.). The peak at  $m/z = 498.10918$  can be assigned to the produced **DCH** (calculated for  $[M-H]^-$  : 498.10889). The peak at  $m/z = 198.98189$  can be assigned to the produced 2,4-dinitrothiophenol (calculated for  $[M-H]^-$  : 198.98190).

## 6. Cytotoxicity assay

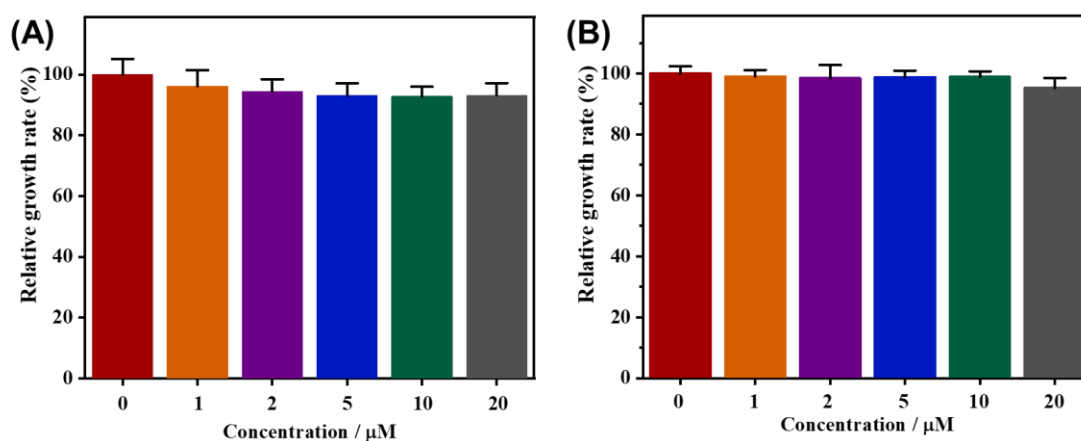

**Fig. S12.** Relative growth rate (%) estimated by the MTT assay. The MCF-7 cells were cultured in the presence of 0–20  $\mu\text{M}$  of (A) **DCH-S** and (B) **DCH** for 24 h, respectively.

## 7. Determination of the detection limit

The detection limit was calculated from the titration experiments according to the following equation<sup>3</sup>:

$$\text{Detection limit} = 3\sigma/k$$

Where  $\sigma$  is the standard deviation of blank measurements,  $k$  is the slope of the linear regression equation (Fig. S13). The detection limit was calculated to be 47 nM.

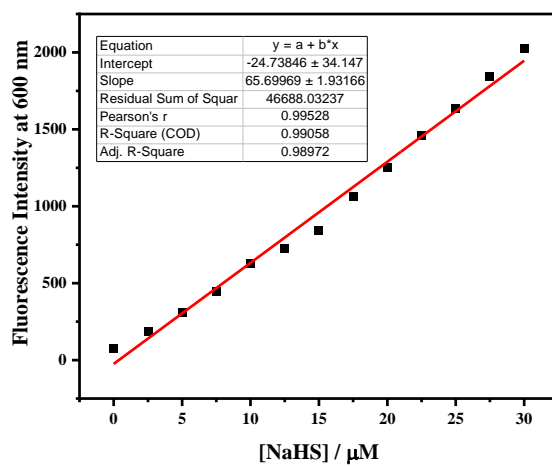

**Fig. S13** Determination of detection limits from the fluorescence intensity data.

## 8. Theoretical calculations

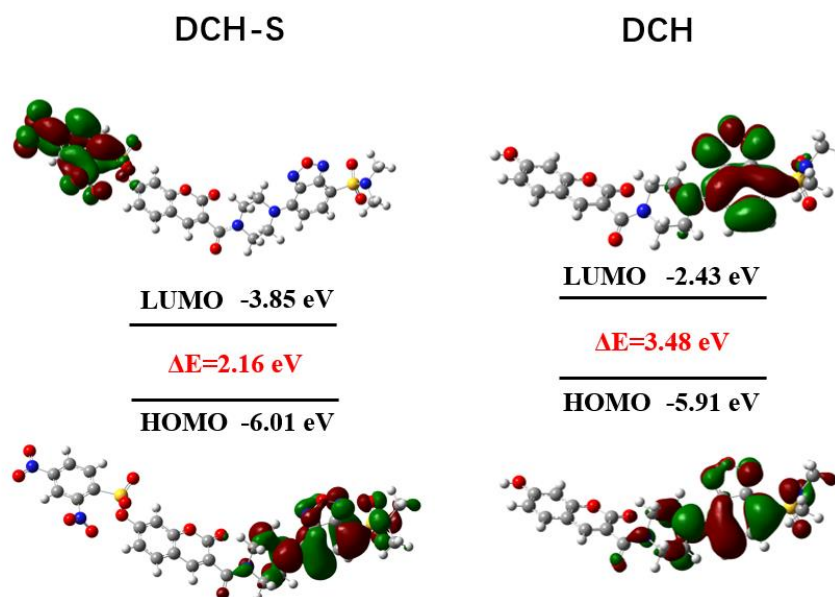

**Fig. S14** The HOMO and LUMO of **DCH-S** and **DCH**. The geometries of the molecules were optimized and their frontier molecular orbital energies were calculated using Gaussian 16 (density functional theory/time-dependent density functional theory (DFT/TDDFT) at B3LYP/6-31G(d) level).

## 9. Mean fluorescence intensities of confocal imaging in MCF-7 cells

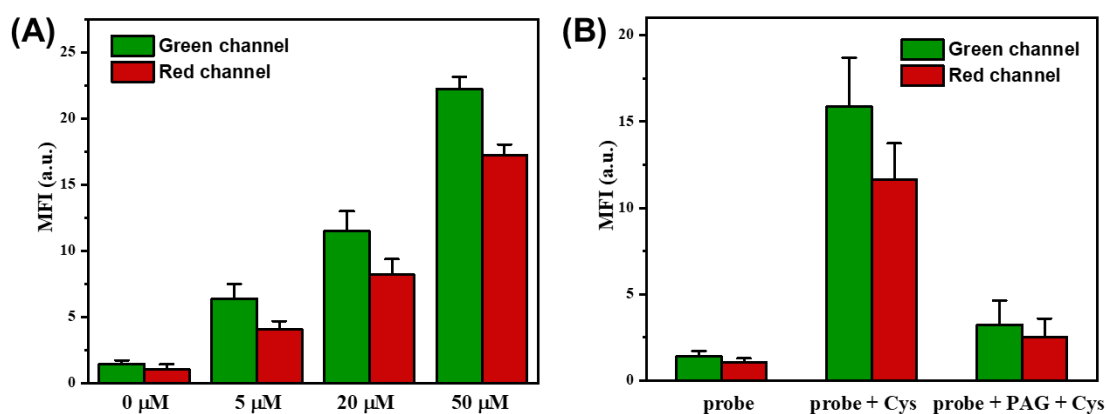

**Fig. S15** Mean fluorescence intensities (MFI) of confocal imaging of (A) exogenous and (B) endogenous H<sub>2</sub>S in MCF-7 cells. The error bars represent the standard deviation ( $\pm$  SD).

Table S1 Properties of the reported fluorescent probes for H<sub>2</sub>S in recent years

| Probe structure                                                                     | Solution                                          | $\lambda_{em}/nm$ | Response time | Detection limit | Ref.      |
|-------------------------------------------------------------------------------------|---------------------------------------------------|-------------------|---------------|-----------------|-----------|
| 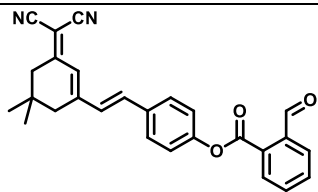   | DMSO/PBS buffer (10 mM, pH 7.4, 1:9, v/v)         | 560/650           | 12 min        | 39.1 nM         | 4         |
|    | HEPES buffer (20 mM, pH 7.4, containing 20% DMSO) | 630/805           | 10 min        | 0.5 $\mu$ M     | 5         |
|    | DMF/PBS buffer (10 mM, pH 7.4, 1:1, v/v)          | 741               | 5 min         | 96 nM           | 6         |
|   | PBS buffer (10 mM, pH 7.4)                        | 560               | 30 min        | 80 nM           | 7         |
|  | PBS buffer (10 mM, pH 7.4, containing 1% DMSO)    | 668               | 10 min        | 14.8 nM         | 8         |
|  | EtOH/HEPES buffer (10 mM, pH 7.4, 3:7, v/v)       | 736               | 20 min        | 20 nM           | 9         |
|  | DMSO/PBS buffer (pH 7.4, 2:8, v/v)                | 644               | 3 min         | 88 nM           | 10        |
|  | PBS buffer (10 mM, pH 7.4)                        | 456/600           | 5 min         | 47 nM           | This work |

## References

- 1 T. K. Yasutaka Kurishita, Akio Ojida, and Itaru Hamachi, *J Am Chem Soc*, 2010, **132**, 13290-13299.
- 2 Y. Li, Y. Yang and X. Guan, *Anal Chem*, 2012, **84**, 6877-6883.
- 3 D. Pan, F. Luo, X. Liu, W. Liu, W. Chen, F. Liu, Y. Q. Kuang and J. H. Jiang, *Analyst*, 2017, **142**, 2624-2630.
- 4 W. Shu, S. Zang, C. Wang, M. Gao, J. Jing and X. Zhang, *Anal Chem*, 2020, **92**, 9982-9988.
- 5 Z. Chen, X. Mu, Z. Han, S. Yang, C. Zhang, Z. Guo, Y. Bai and W. He, *J Am Chem Soc*, 2019, **141**, 17973-17977.
- 6 K. Zhou, Y. Yang, T. Zhou, M. Jin and C. Yin, *Dyes Pigments*, 2021, **185**, 108901.
- 7 Q. Sun, H. Liu, Y. Qiu, J. Chen, F. S. Wu, X. G. Luo and D. W. Wang, *Spectrochim Acta A Mol Biomol Spectrosc*, 2021, **254**, 119620.
- 8 Q. Yang, L. Zhou, L. Peng, G. Yuan, H. Ding, L. Tan and Y. Zhou, *New J Chem*, 2021, **45**, 7315-7320.
- 9 T. Zhou, Y. Yang, K. Zhou, M. Jin, M. Han, W. Li and C. Yin, *Sensor Actuator B Chem*, 2019, **301**, 127116.
- 10 J. Yuan, T. B. Ren, S. Xu, C. J. Wang, X. B. Zhang and L. Yuan, *ACS Appl Bio Mater*, 2021, **4**, 6016-6022.
